# Supplementary material for: Clinical and genetic analysis of lipoprotein glomerulopathy patients caused by APOE mutations
Source: PubMed Central journal article supplement (PMC7434605; doi:10.1002/mgg3.1281), 2020-05-22

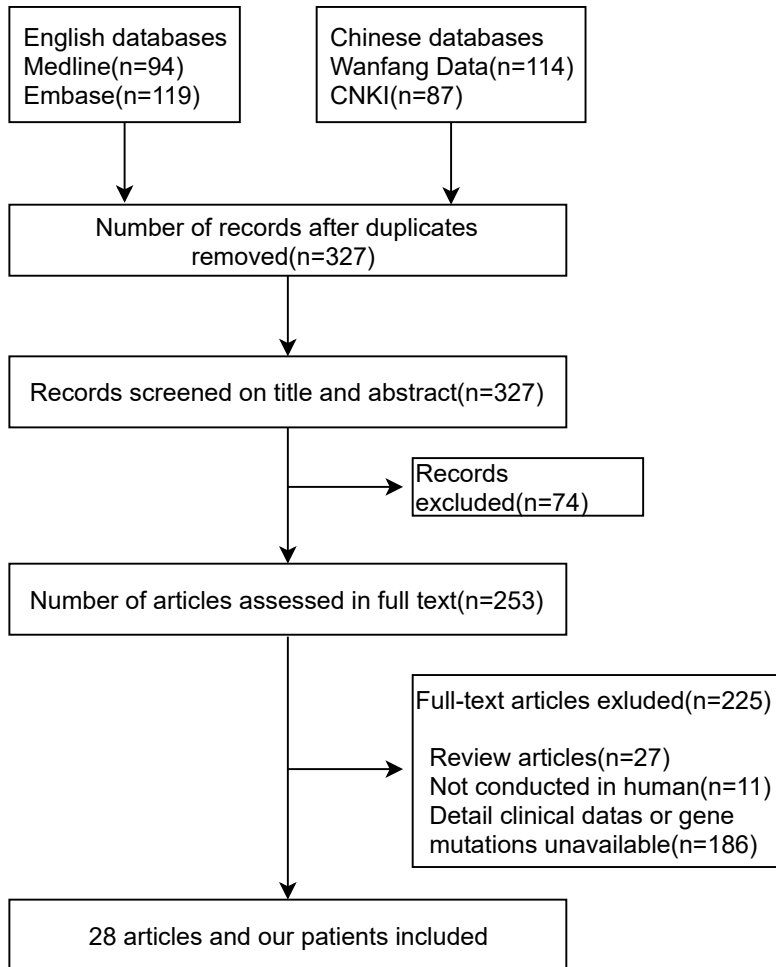

Supplement: MGG3-8-e1281-s001.pdf [file MGG3-8-e1281-s001.pdf]
